# Supplementary material
Source: PubMed Central journal article supplement (PMC5007562)
Supplement: EMBR-17-1264-s001.pdf [file EMBR-17-1264-s001.pdf]

## **Appendix**

Appendix figure legends, page 1

Appendix figures, page 3

Appendix Table S1, page 9

Appendix Table S2, page 10

## Appendix Figures legend

### Appendix Fig. S1. Subcellular localization of FATE1 wild-type and mutant proteins in transfected HeLa cells.

- A. Subcellular localization of transfected N-Flag tagged FATE1 (red) and fluorescent markers for Golgi, ER and mitochondria, respectively (green). Scale bars, 10  $\mu\text{m}$ .
- B. Subcellular localization of wild-type and mutant EGFP-FATE1 fusion proteins. The mitochondrial marker TOM20 is stained in red. Scale bars, 10  $\mu\text{m}$ .
- C. Subcellular localization of EGFP-FATE1 fusion proteins mutated in C-terminal domain basic residues. The mitochondrial marker TOM20 is stained in red. Scale bars, 10  $\mu\text{m}$ .

### Appendix Fig. S2. Predictions of coiled-coil structures in the FATE1 protein.

- A. Hydrophobic cluster analysis (HCA) plot (Callebaut *et al.*, 1997) of the FATE1 protein sequence. Amino acid residues are indicated with their one-letter code, except that proline is indicated with a star, threonine with a square, serine with a dotted square and glycine with a diamond. Clusters of hydrophobic residues in the protein sequence are evidenced in the bidimensional diagram. The position of L151 is highlighted with a red circle.
- B. Prediction of coiled-coil structures in the wild-type FATE1 protein by the COILS software.
- C. Prediction of coiled-coil structures in the L151D FATE1 mutant by the COILS software. The mutant greatly decreases the probability of coiled-coil formation in the C-terminal portion of the FATE1 protein.

### Appendix Fig. S3. Blue native PAGE for detection of FATE-1 containing complexes in crude mitochondrial extracts from H295R/TR N-Flag FATE1 cells.

Extracts were prepared from cells cultured in basal conditions or after Dox stimulation using either digitonin (Dig.) or *n*-dodecyl- $\beta$ -D-maltoside (DDM), run on native PAGE and transferred to a PVDF membrane. Immunoblotting was performed with an anti-Flag antibody.

### Appendix Fig. S4. Colocalization of FATE1 with ER and mitochondria in Dox-treated H295R/TR SF-1 cells.

Endogenous FATE1 (green), ER labelled by anti-calreticulin antibody (red) and mitochondria labelled by HSP60 staining (blue). Scale bar, 10  $\mu\text{m}$ . A custom-made ImageJ macro software was used to draw colocalization profiles in two different positions of the same image shown in Fig. 2G. Pixel size=81 nm.

### Appendix Fig. S5. Colocalization of FATE1 with ER and mitochondria in Dox-treated H295R/TR N-Flag FATE1 cells.

Endogenous FATE1 (green), ER labelled by anti-calreticulin antibody (red) and mitochondria labelled by MitoTracker staining (blue). Two areas (a and b) showing close apposition of red, green and blue staining (white signals) are shown at higher magnification. Scale bar, 10  $\mu\text{m}$ . A custom-made ImageJ macro software was used to draw colocalization profiles in three different positions of the image. Pixel size=60 nm.



**Appendix Fig. S6. BIK expression in H295R cell lines used in this study.** HeLa cells were used as positive control, as shown in ref. 53.

**Additional reference**

Callebaut I, Labesse G, Durand P, Poupon A, Canard L, Chomillier J, Henrissat B, Mornon JP (1997) Deciphering protein sequence information through hydrophobic cluster analysis. Current status and perspectives. *Cell Mol Life Sci* **53**: 621-645

# Appendix Figure S1

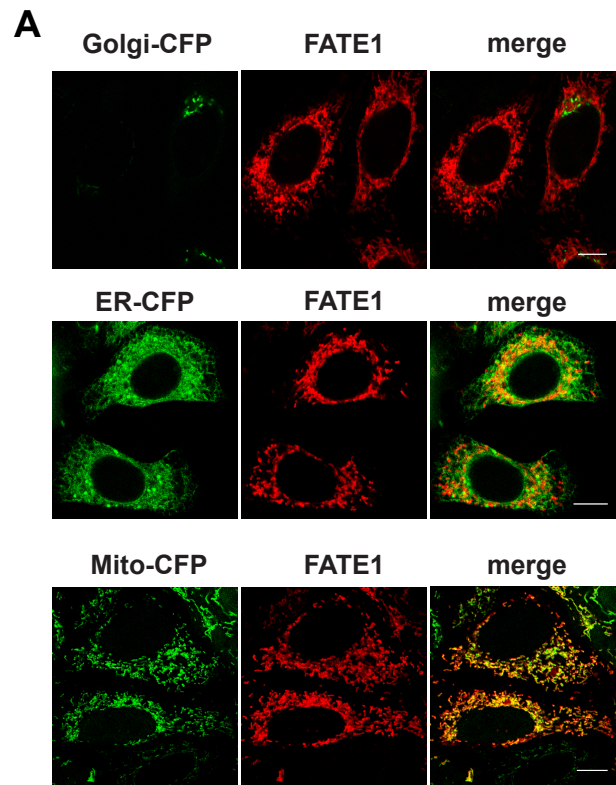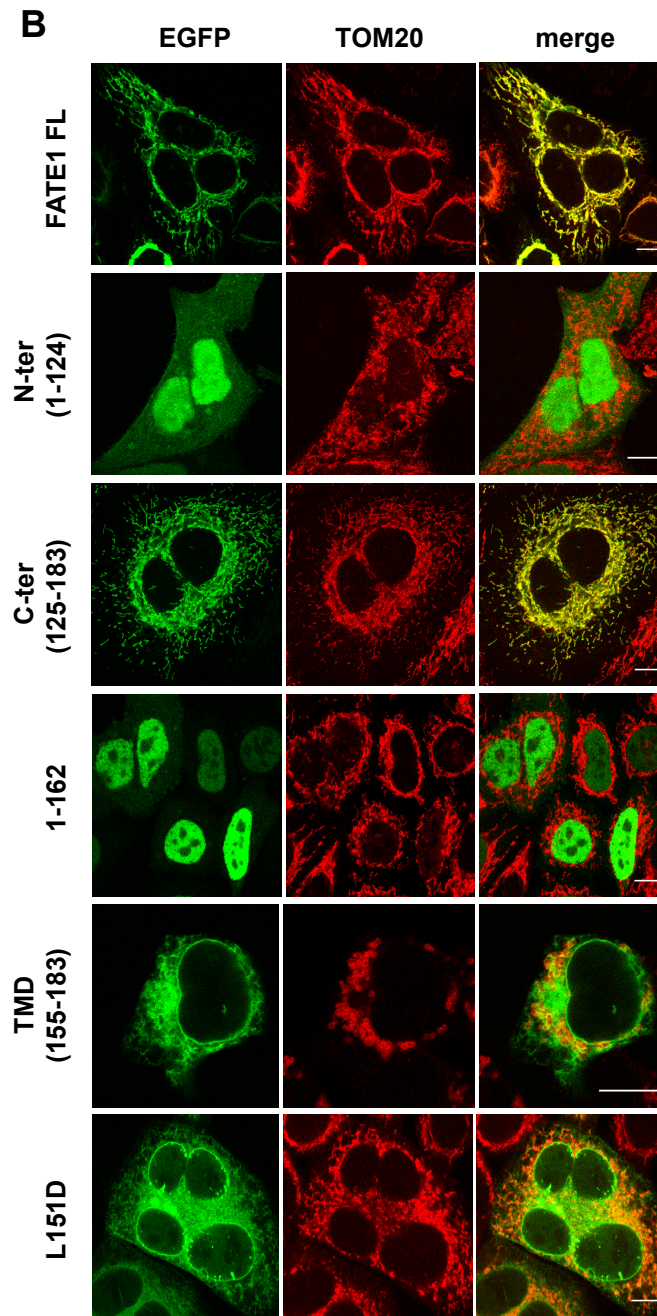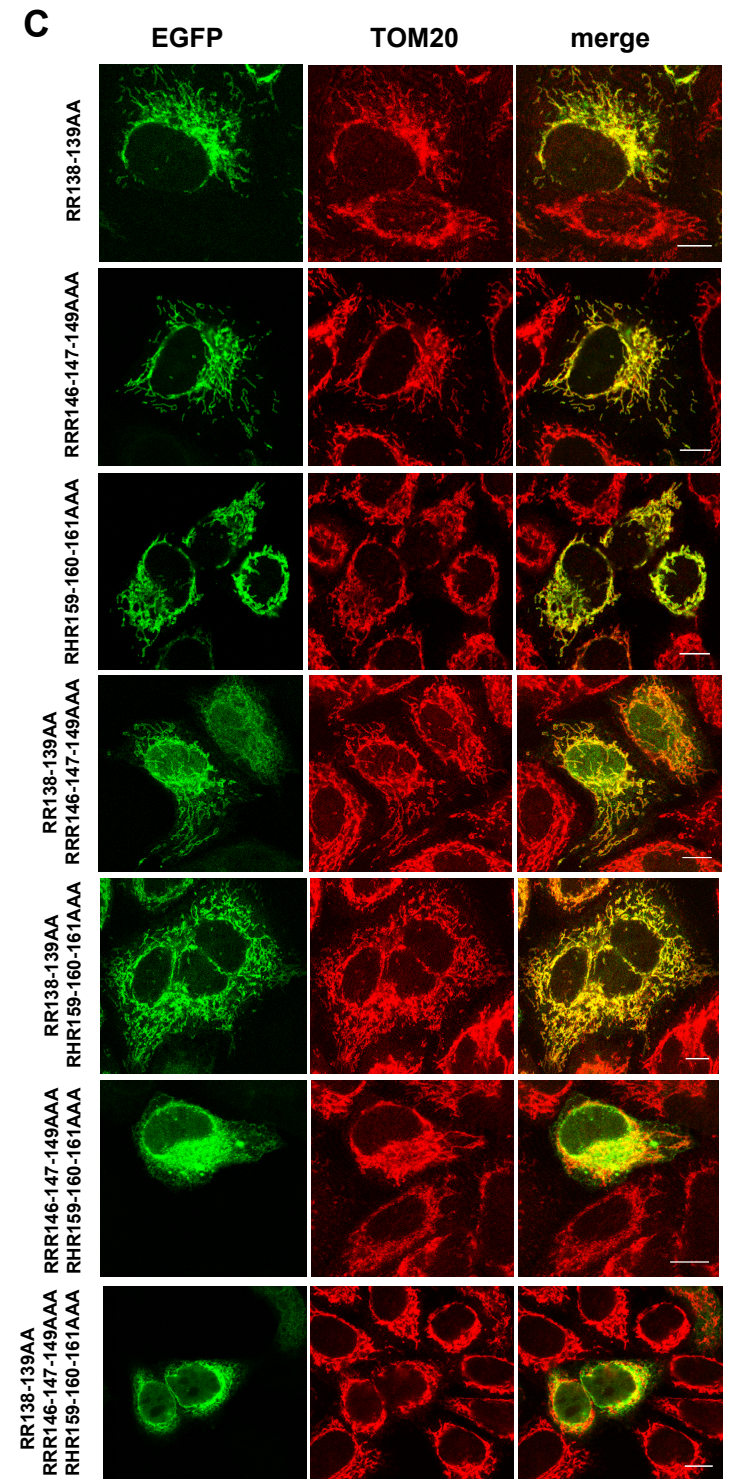

# Appendix Figure S2

**A**

## Hydrophobic Cluster Analysis (HCA)

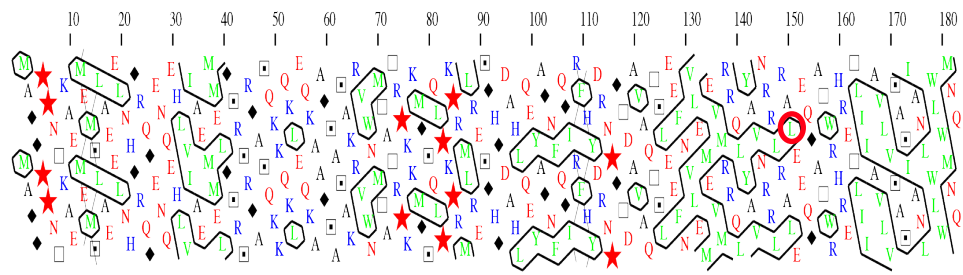

**B**

### FATE1 WT

### FATE1 L151D

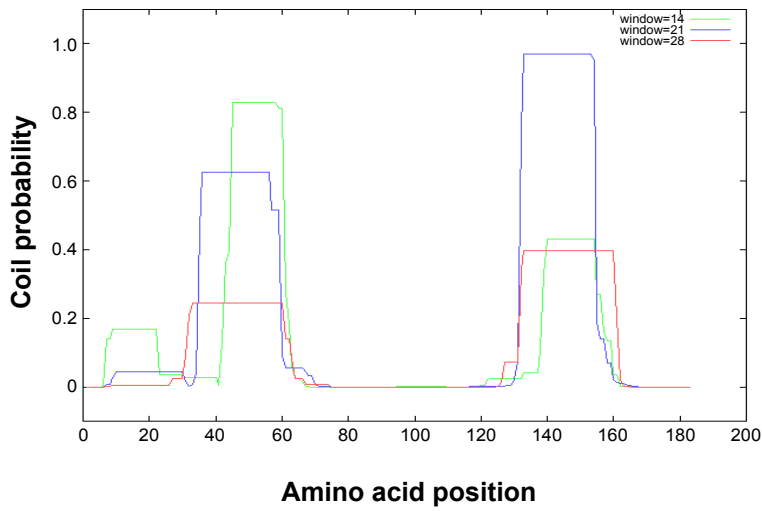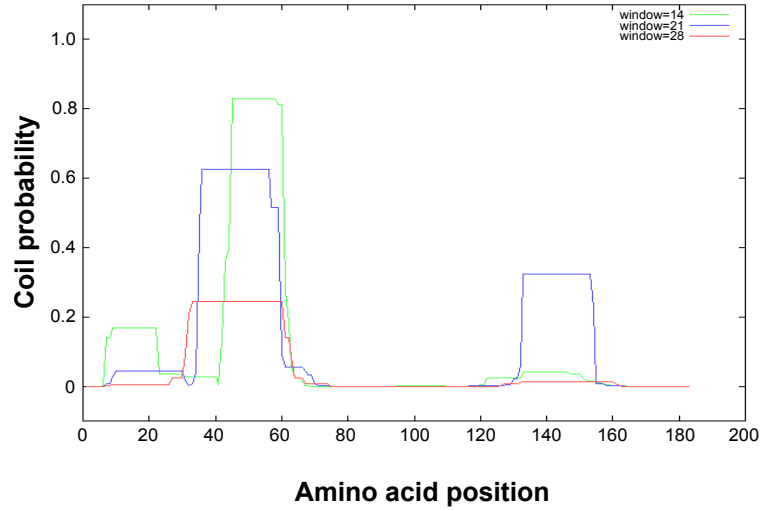

# Appendix Figure S3

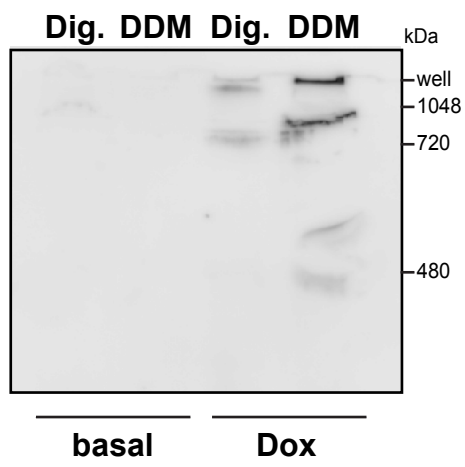

# Appendix Figure S4

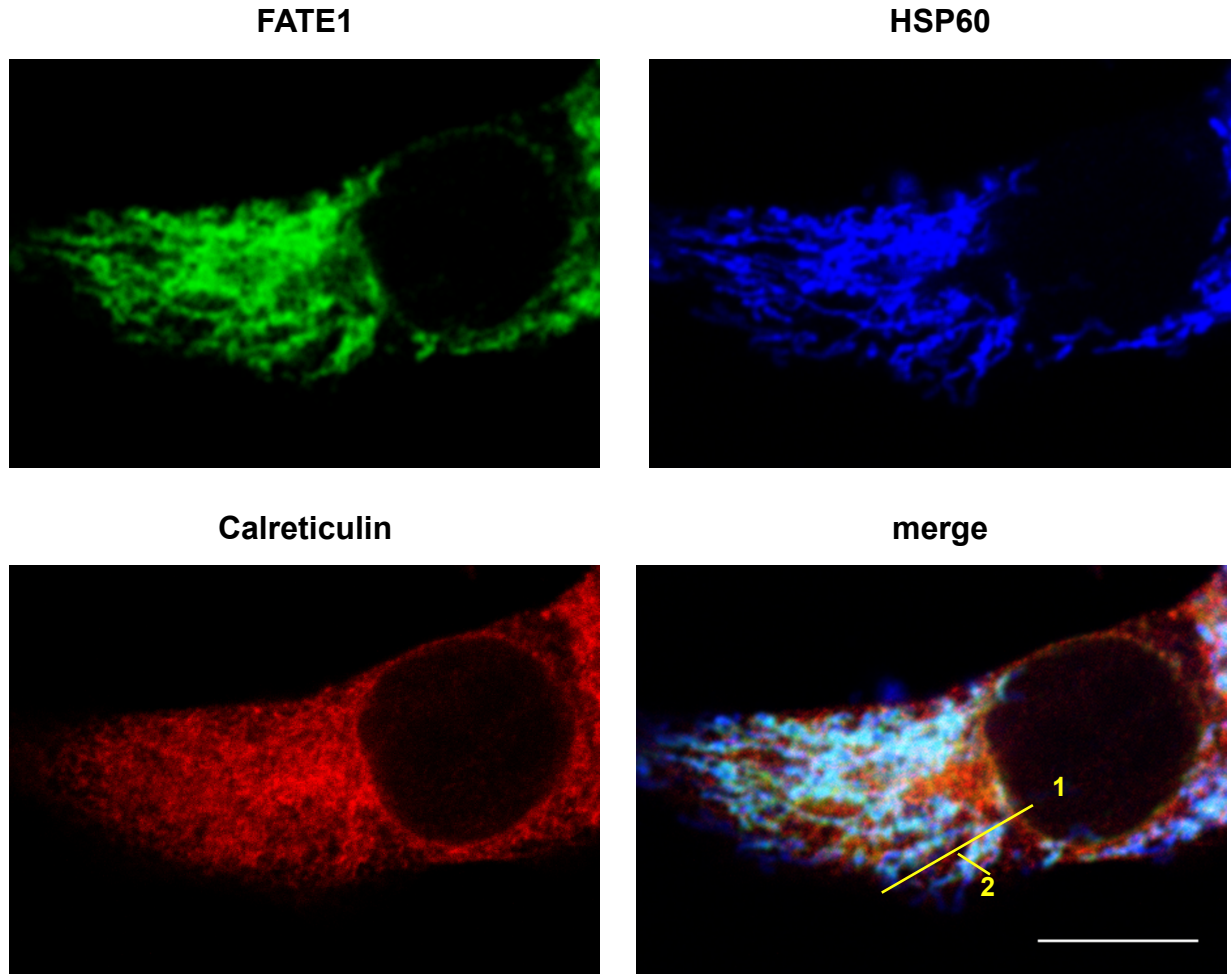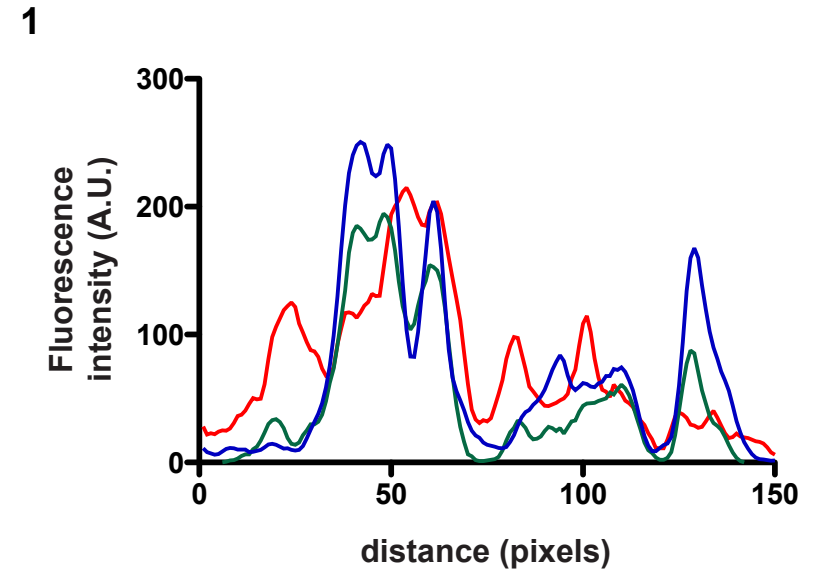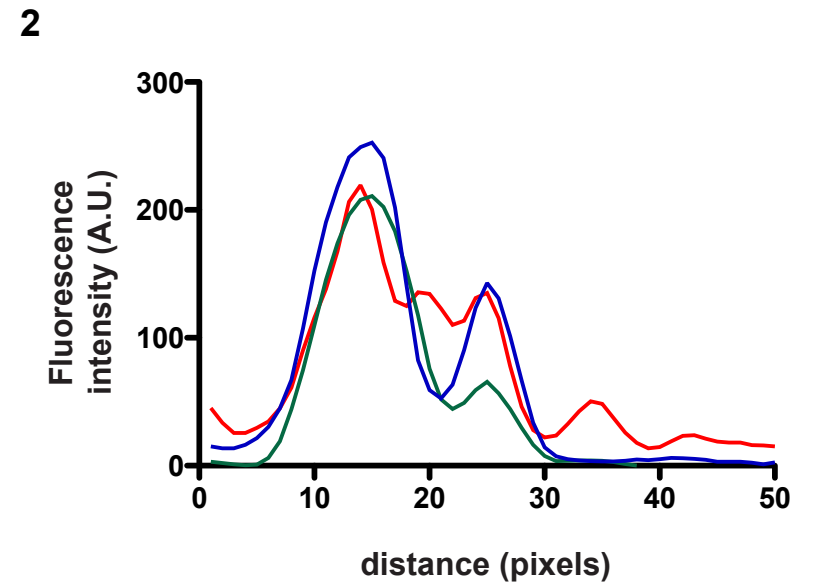



# Appendix Figure S5

FATE1

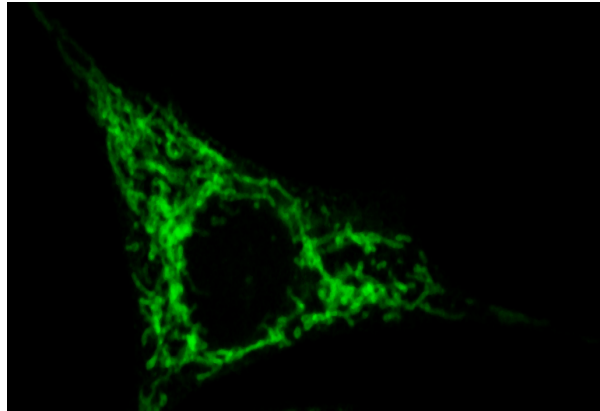

MitoTracker

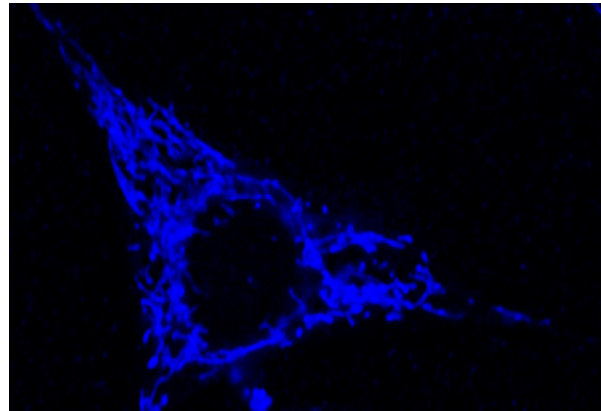

Calreticulin

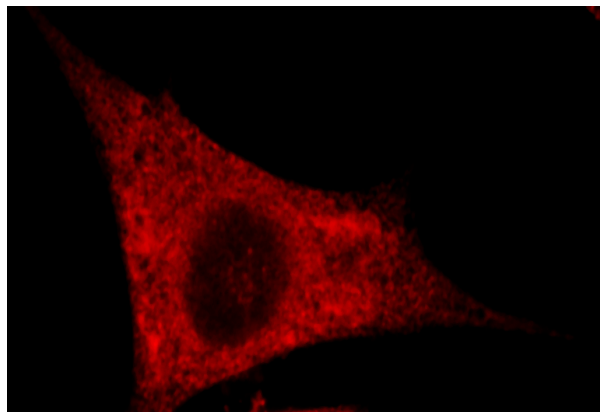

merge

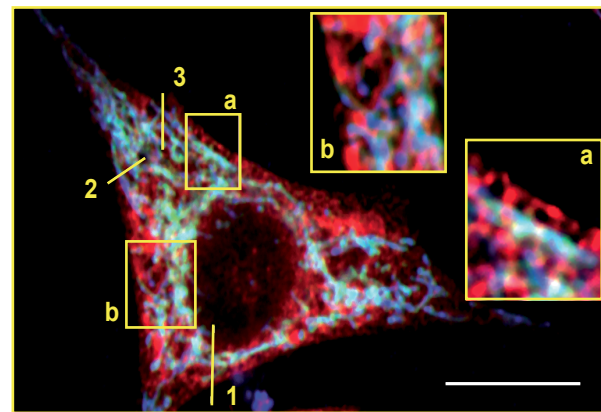

1

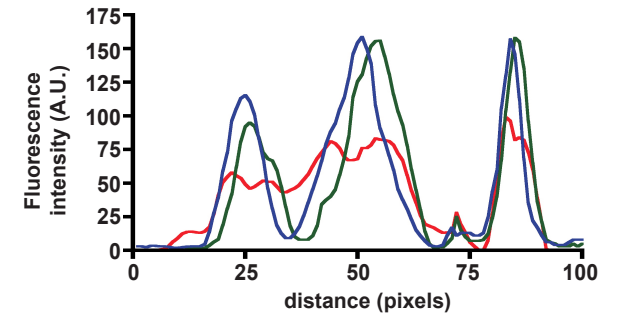

2

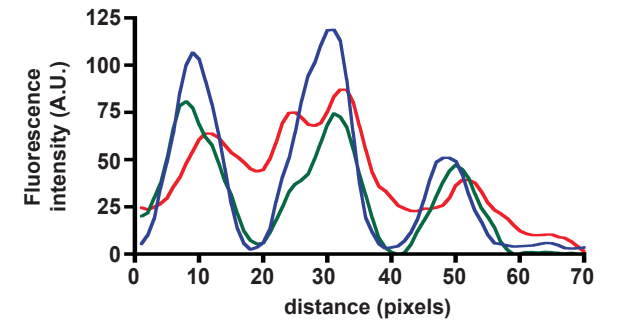

3

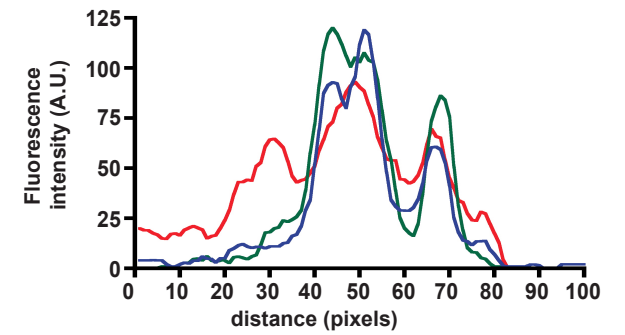

Appendix Figure S6

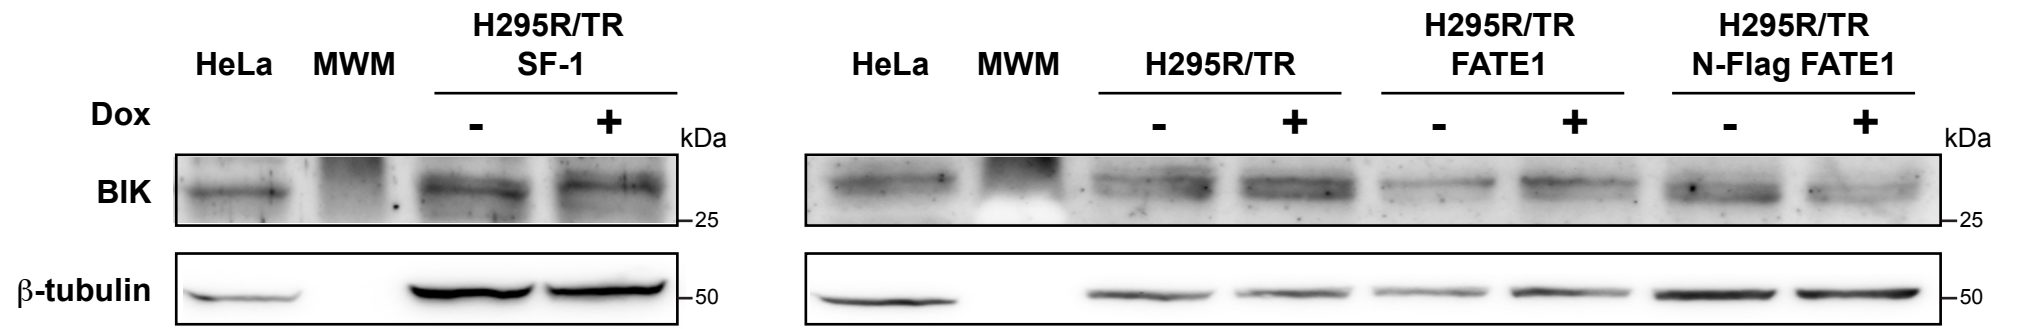

## Appendix Table S1

| <b>Name</b>                                         | <b>ID</b> | <b>MW</b> | <b>Coverage</b> |
|-----------------------------------------------------|-----------|-----------|-----------------|
| Mitochondrial inner membrane protein                | Q16891    | 84025 Da  | 27%             |
| 78 kDa glucose-regulated protein                    | P11021    | 72402 Da  | 18%             |
| Heat shock cognate 71 kDa protein                   | P11142    | 71082 Da  | 26%             |
| Tubulin beta-2A chain                               | Q13885    | 50274 Da  | 36%             |
| Tubulin beta chain                                  | P07437    | 50095 Da  | 26%             |
| 60S acidic ribosomal protein P0                     | P05388    | 34423 Da  | 25%             |
| Emerin                                              | P50402    | 29033 Da  | 31%             |
| 40S ribosomal protein S3a                           | P61247    | 30154 Da  | 32%             |
| Oxidoreductase HTATIP2                              | Q9BUP3    | 27329 Da  | 31%             |
| 60S ribosomal protein L7                            | P18124    | 29264 Da  | 29%             |
| 40S ribosomal protein S8                            | Q92597    | 24475 Da  | 36%             |
| Fetal and adult testis expressed transcript (FATE1) | Q969F0    | 20698 Da  | 78%             |

Proteins immunoprecipitated by the anti-Flag antibody in Dox-treated H295R/TR N-Flag FATE1 cells were identified by MS/MS. Only proteins whose Mascot score exceeded the threshold significance value ( $p < 0.05$ ) are reported in the Table.



**Appendix Table S2.** Primary antibodies used in this study.

| <b>Antigen</b>                | <b>Supplier</b>          | <b>Catalog number</b> |
|-------------------------------|--------------------------|-----------------------|
| Anti-Flag M2 mouse monoclonal | Sigma-Aldrich            | F3165                 |
| Anti-Flag rabbit polyclonal   | Sigma-Aldrich            | F7425                 |
| BIK/NBK                       | Santa Cruz Biotechnology | sc-10770              |
| Calreticulin                  | Thermo Fisher            | PA3-900               |
| Emerin                        | from D. Toniolo          | NA                    |
| FATE1                         | Abcam                    | ab139275              |
| FATE1                         | Santa Cruz Biotechnology | sc-101220             |
| GRP75                         | Santa Cruz Biotechnology | sc-13967              |
| HSP60                         | Santa Cruz Biotechnology | sc-1052               |
| MCU                           | Sigma-Aldrich            | HPA016480             |
| MCUR1                         | Sigma-Aldrich            | SAB2700722            |
| Mfn1                          | Abcam                    | ab57602               |
| Mfn2                          | Abcam                    | ab50838               |
| Mic60/mitofilin               | MitoSciences             | MSM02                 |
| MICU1                         | Sigma-Aldrich            | HPA037480             |
| MICU2                         | Sigma-Aldrich            | HPA045511             |
| MICU3                         | Sigma-Aldrich            | HPA024771             |
| RPL7                          | from B. Bardoni          | NA                    |
| SERCA2                        | Sigma-Aldrich            | S1439                 |
| Sigma-1 receptor              | Sigma-Aldrich            | HPA018002             |
| SOAT1                         | Abcam                    | ab39327               |
| Tom20                         | Abcam                    | ab115746              |
| VDAC1                         | MitoSciences             | MSA03                 |
