# Supplementary material
Source: PubMed Central journal article supplement (PMC5007562)

Figure 1A

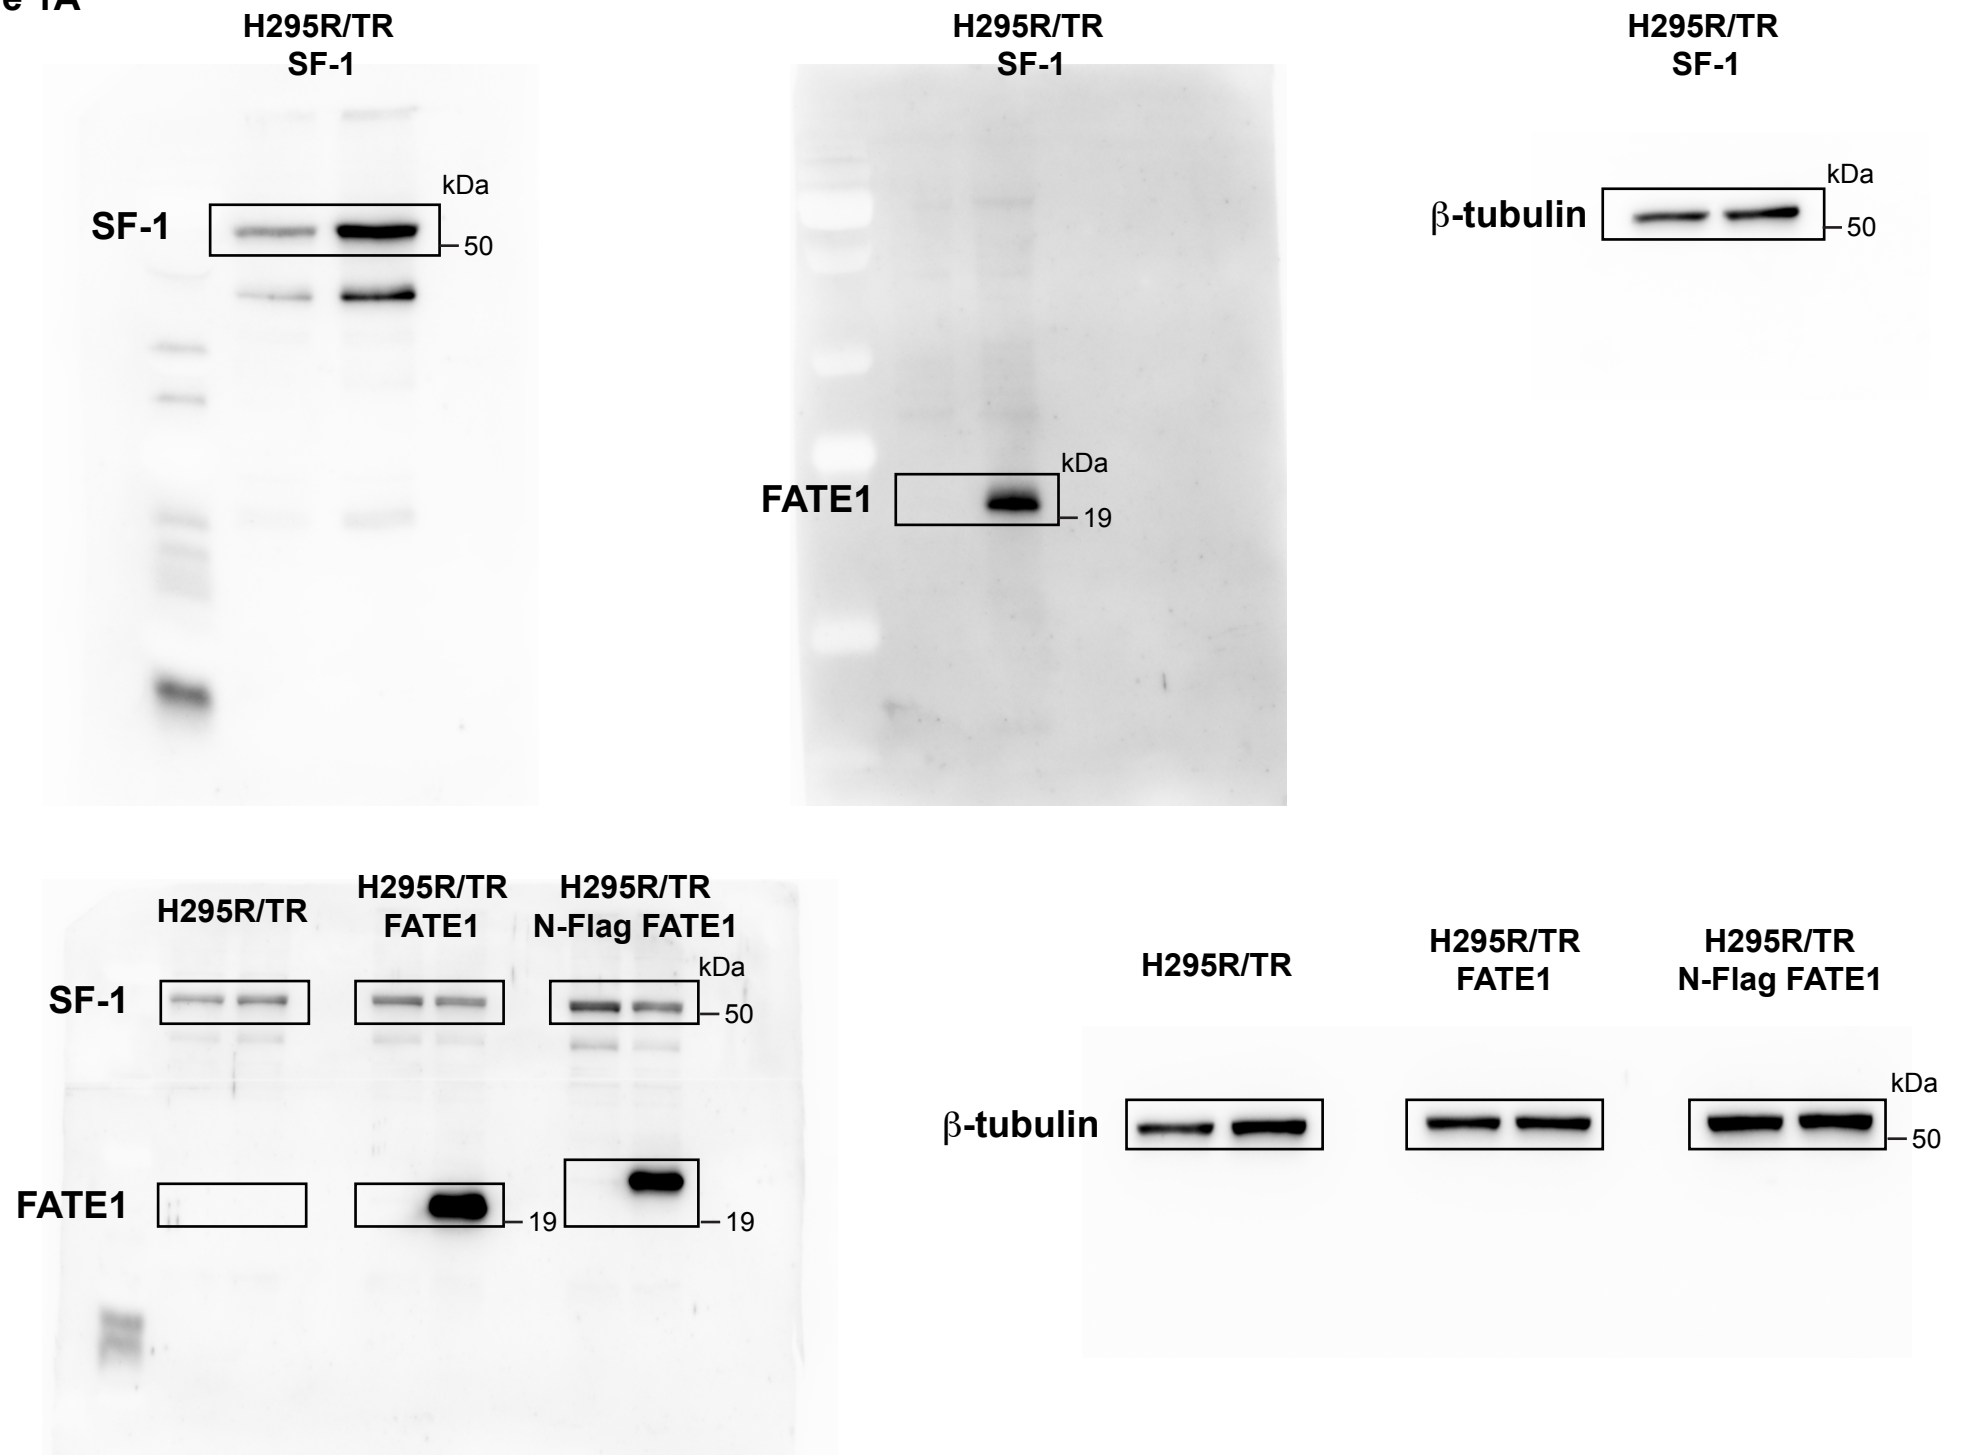

Figure 1G

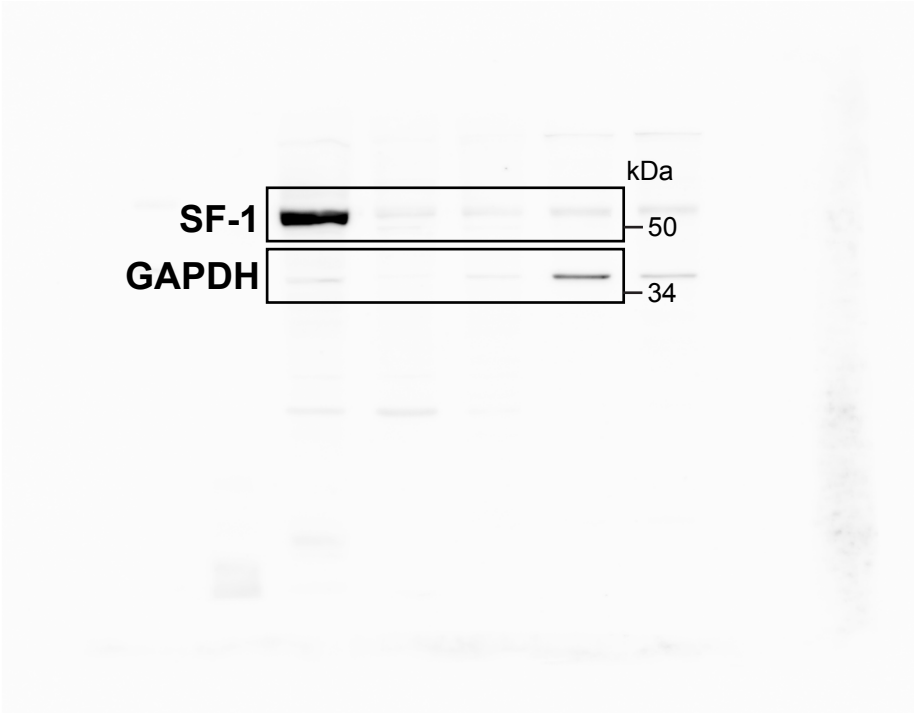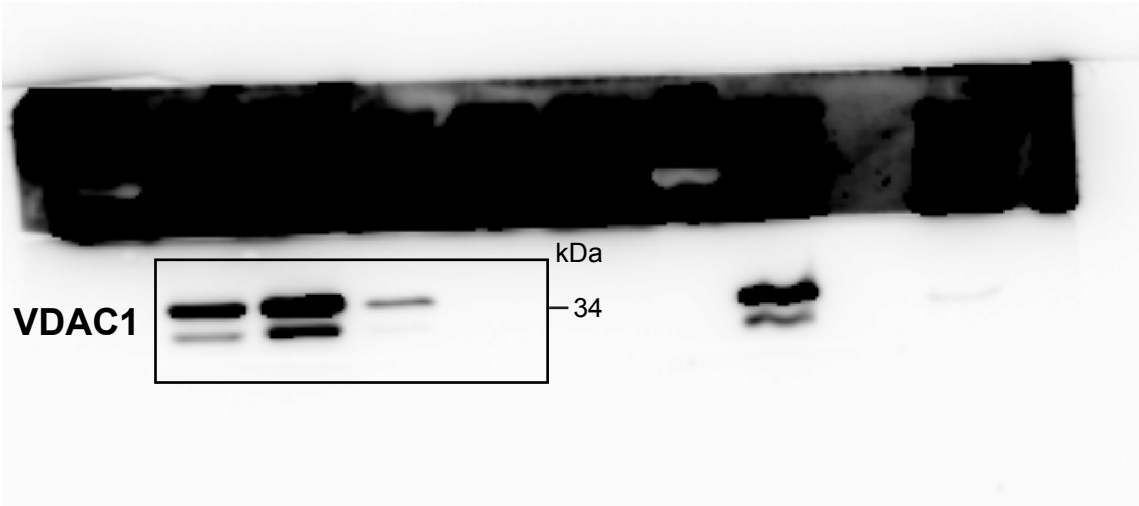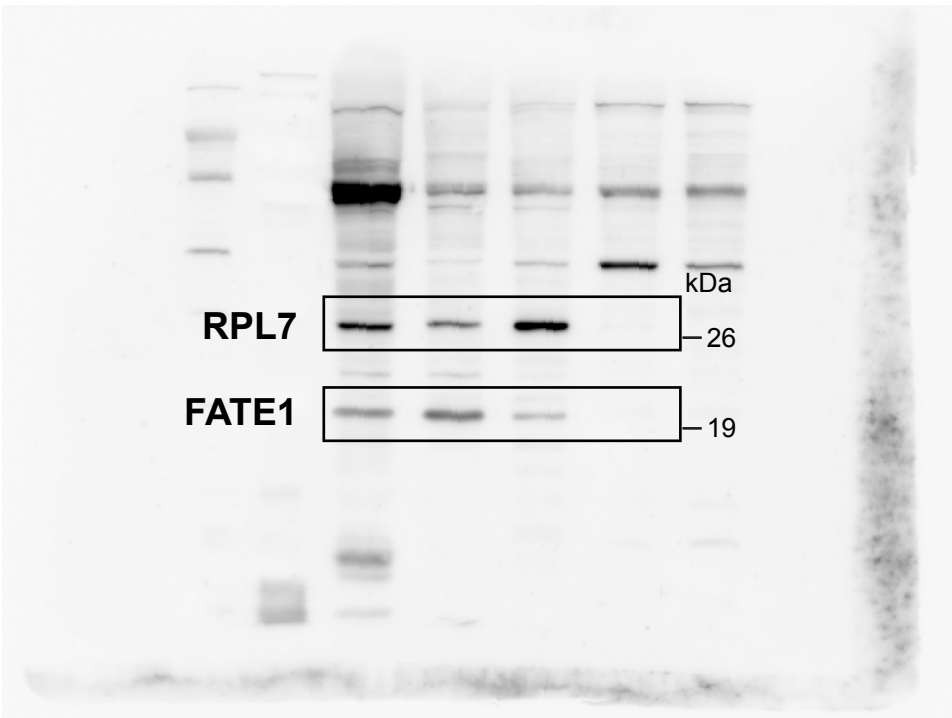

Figure 1H

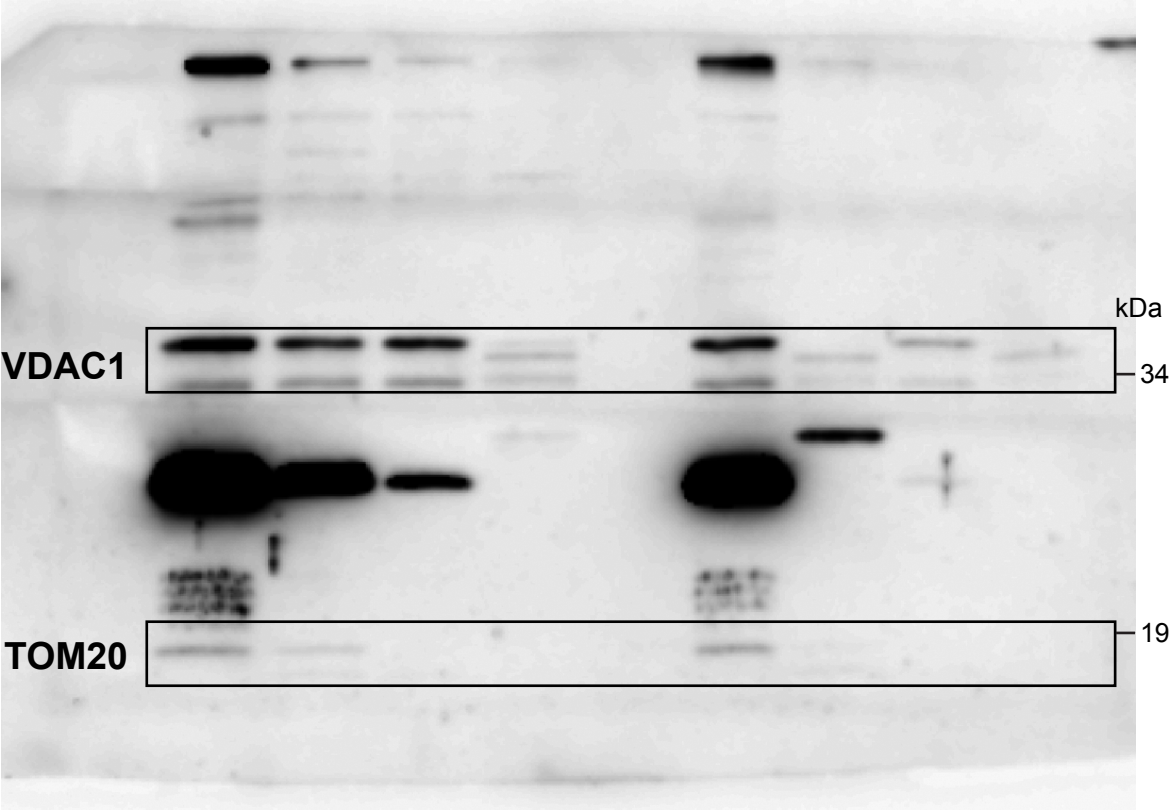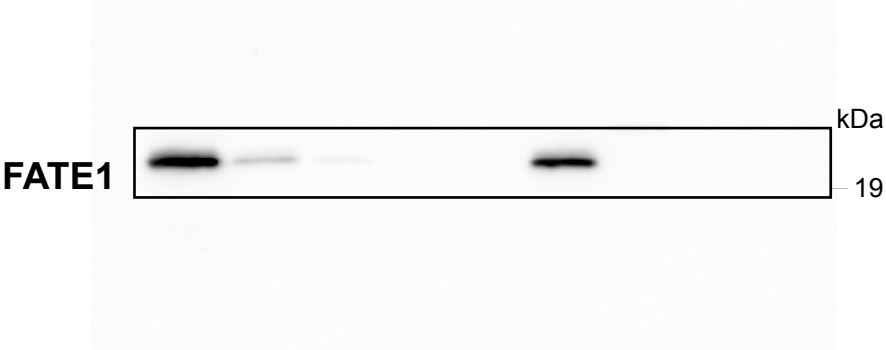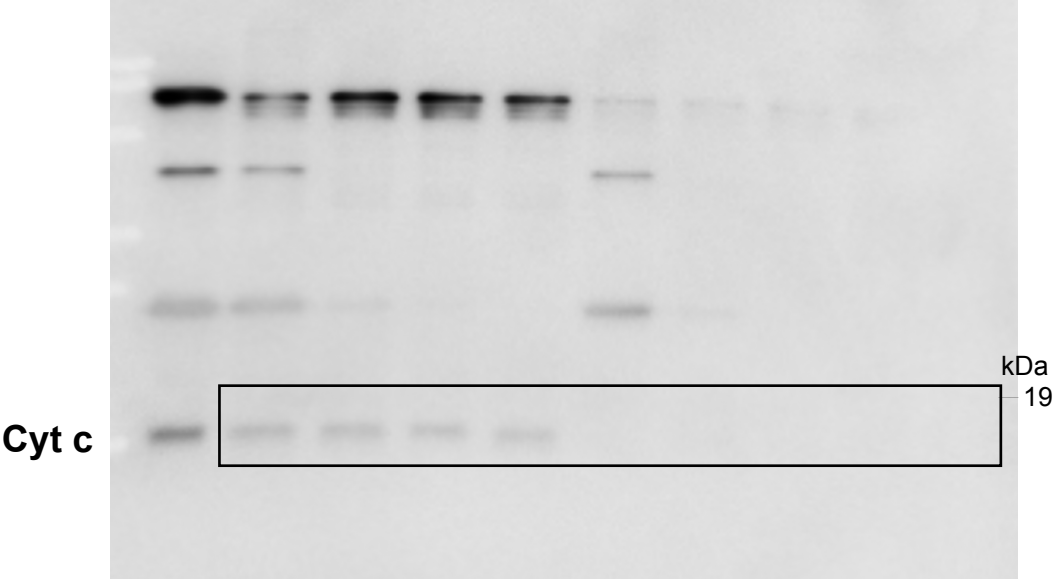

Figure 1I

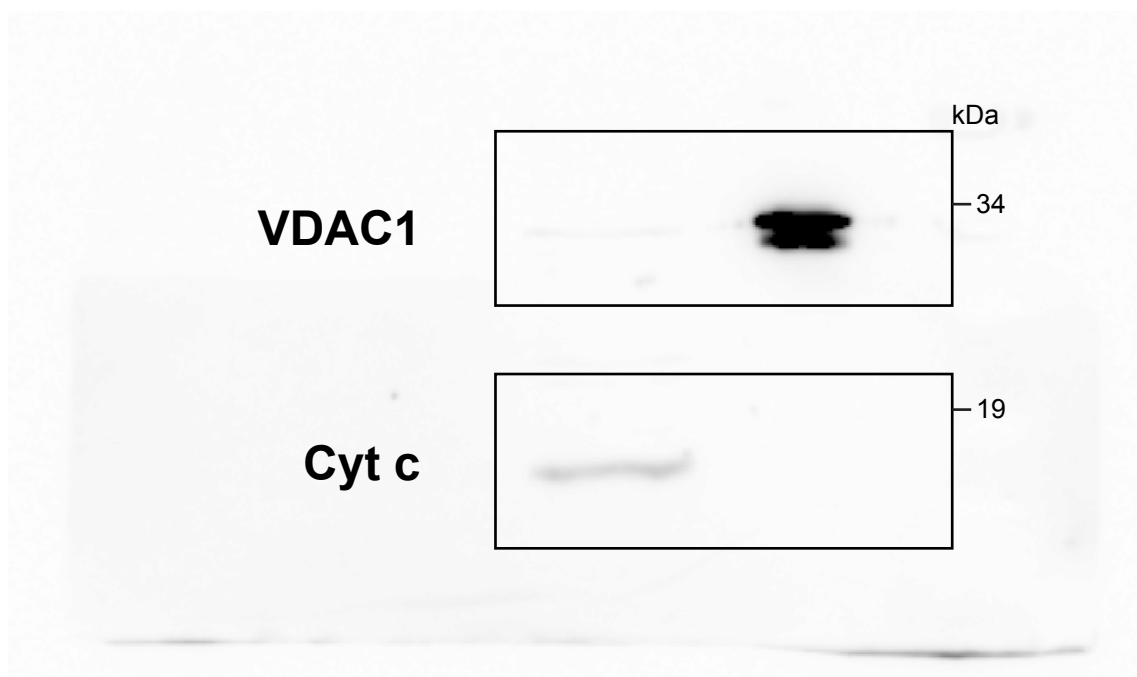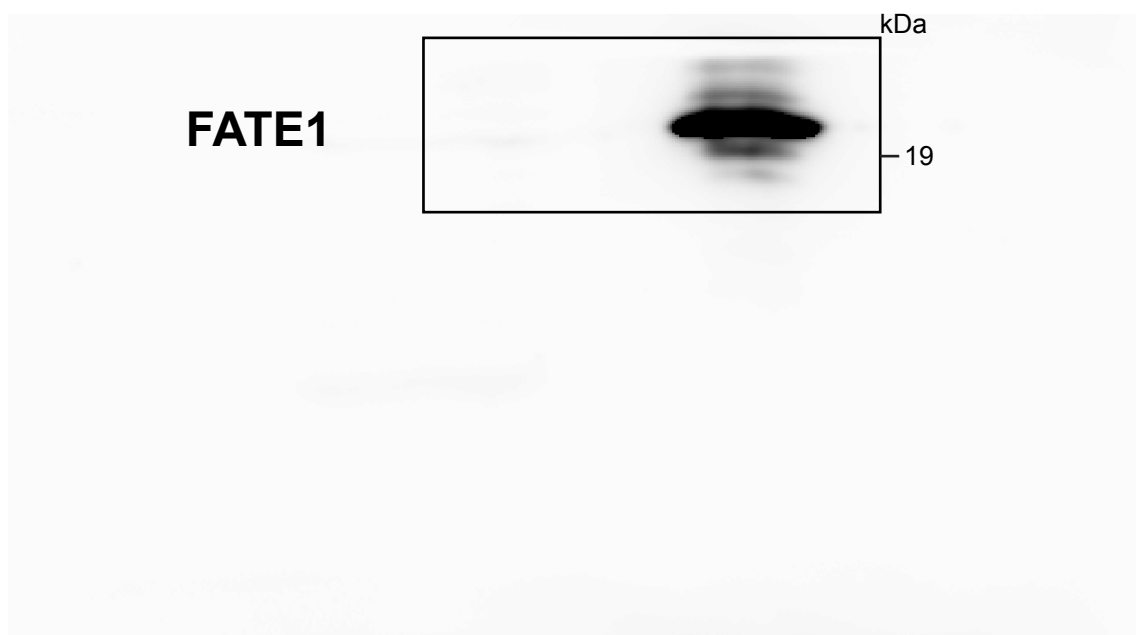

Supplement: EMBR-17-1264-s004.pdf [file EMBR-17-1264-s004.pdf]

Figure 2C

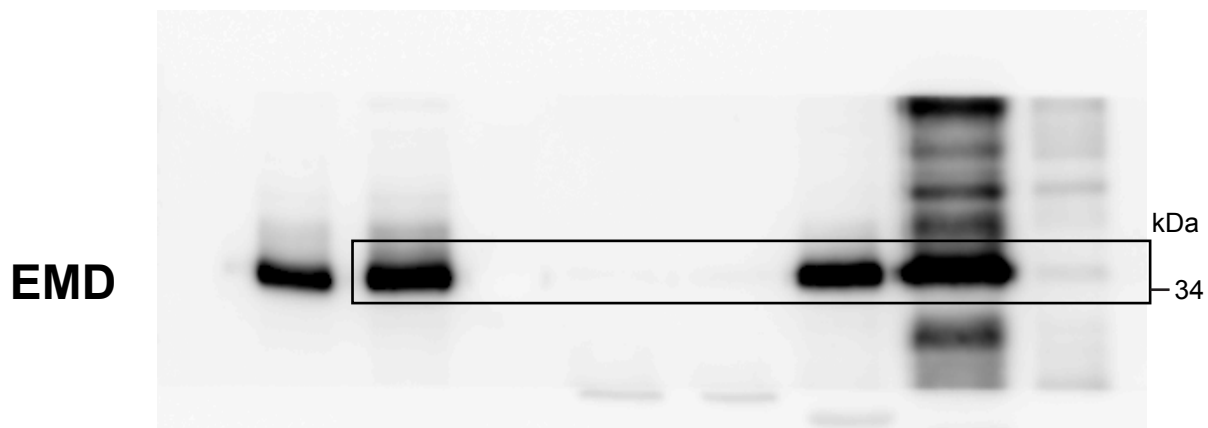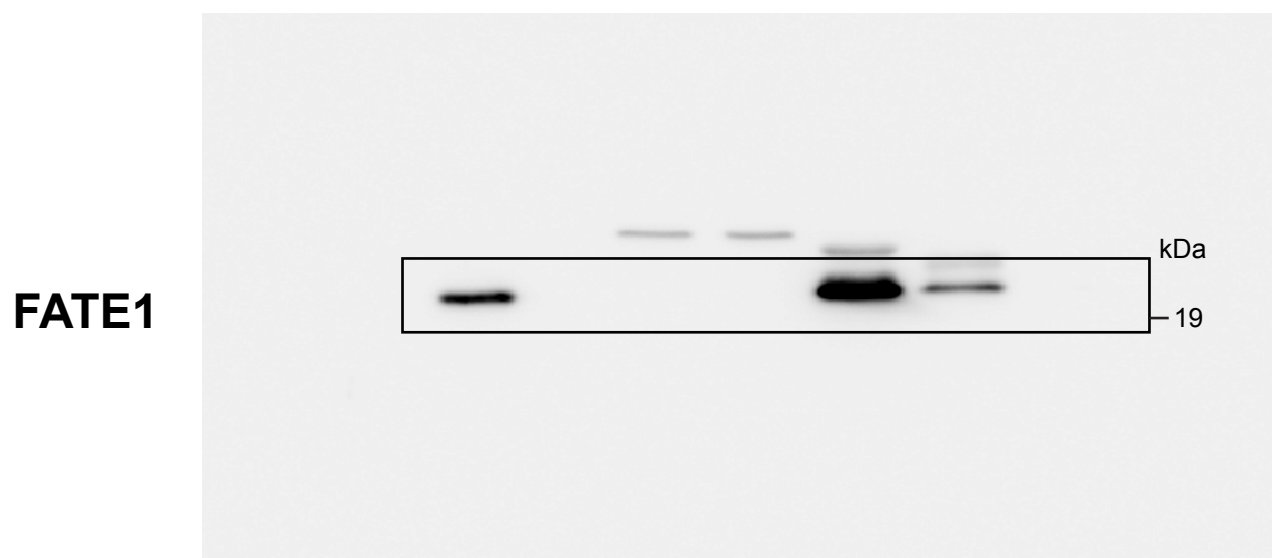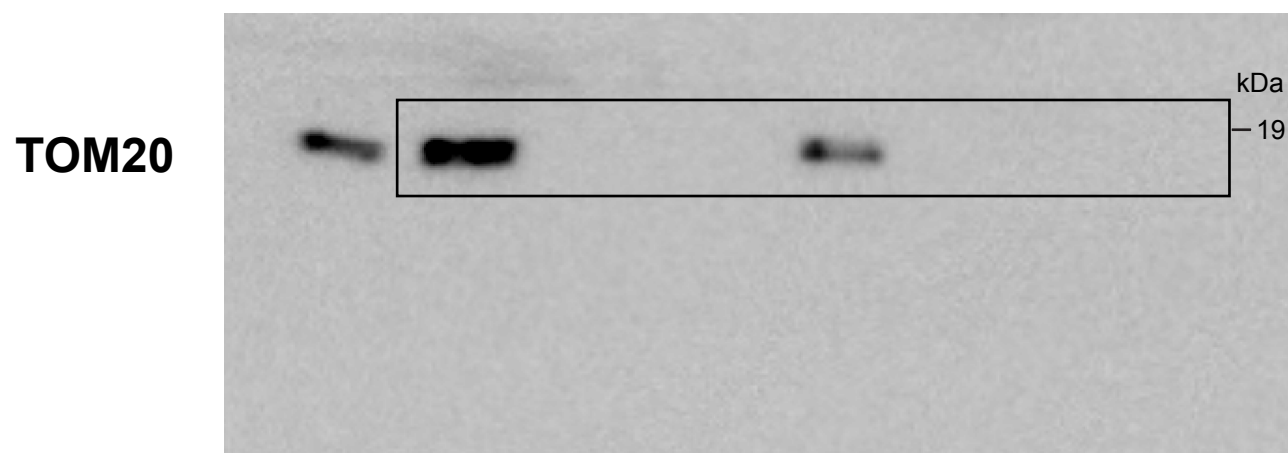

Figure 2E

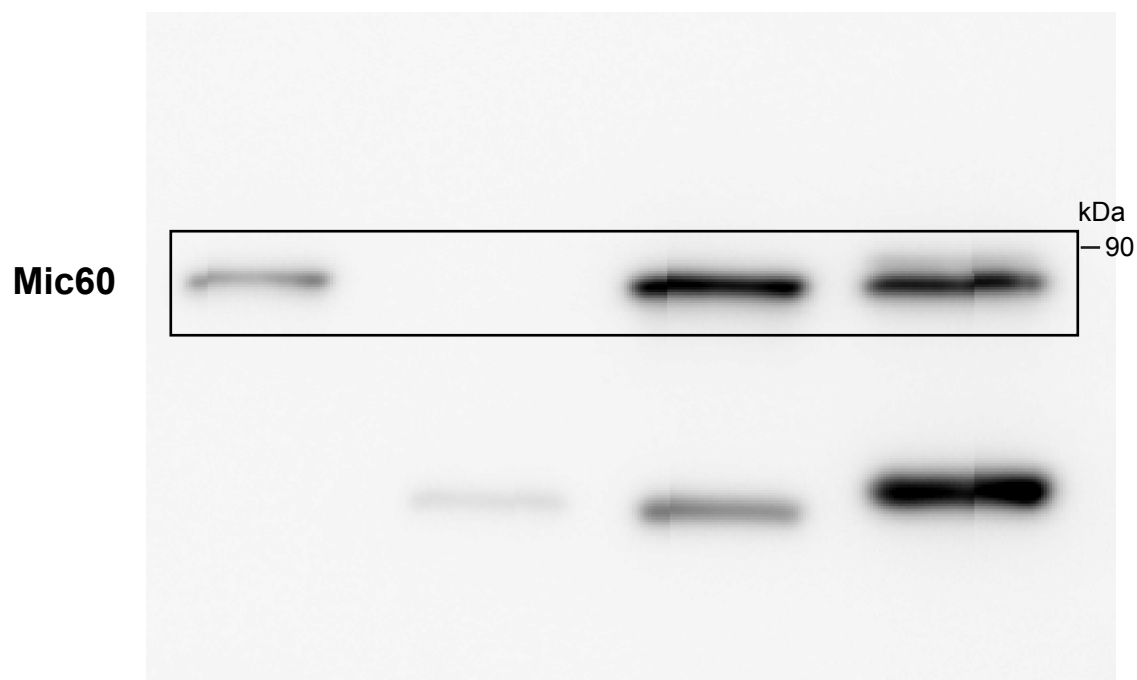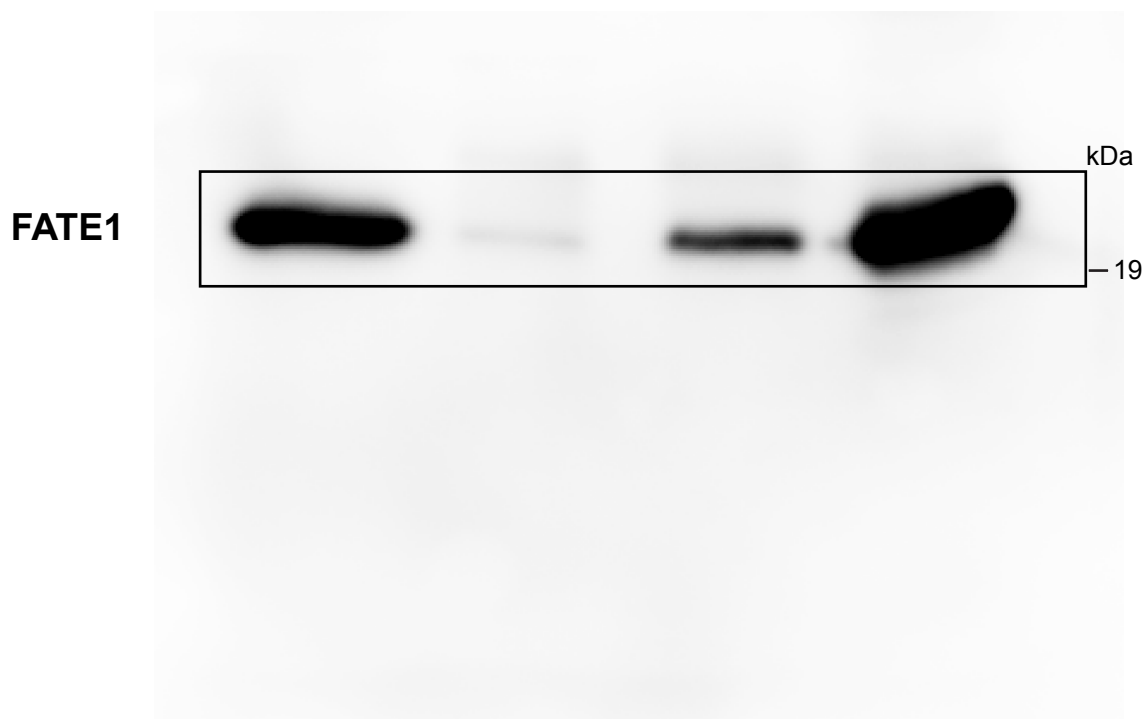

Figure 2H\_1

SERCA2

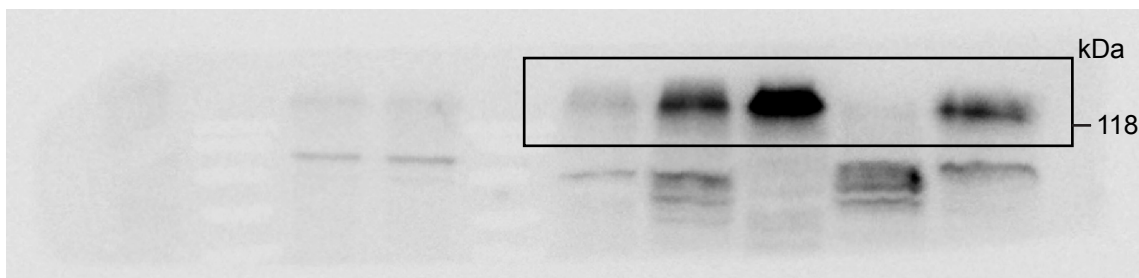

SOAT1

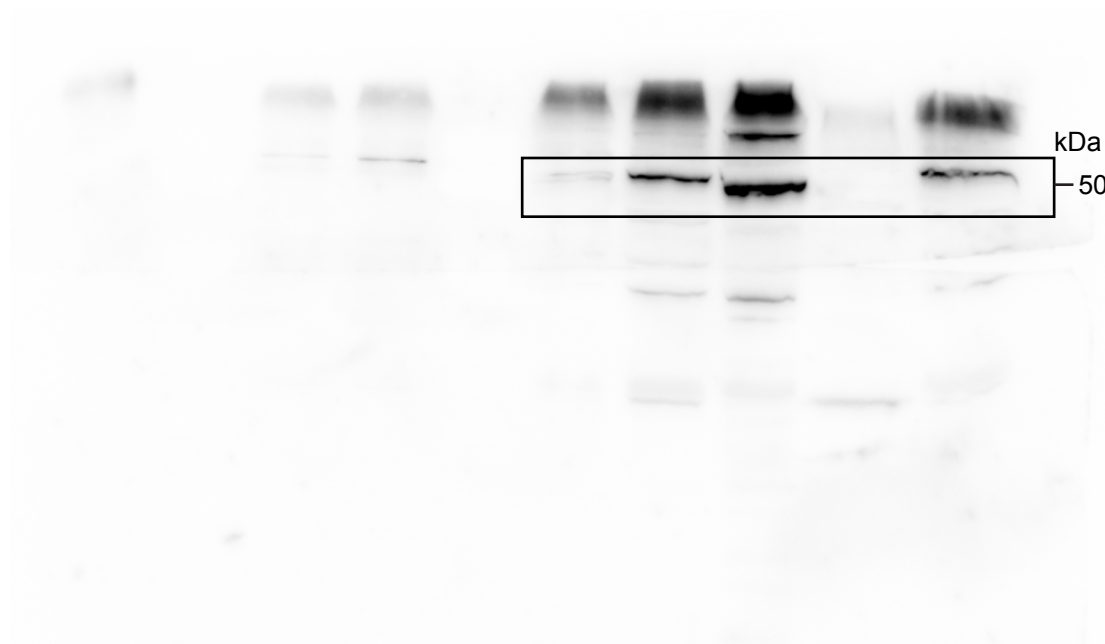

Mic60

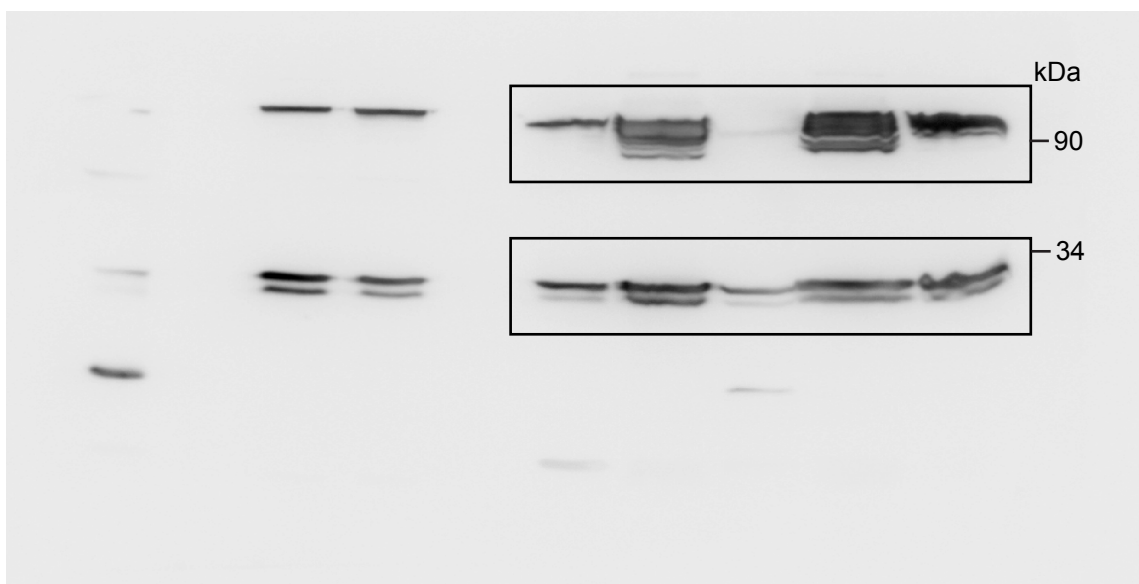

VDAC1

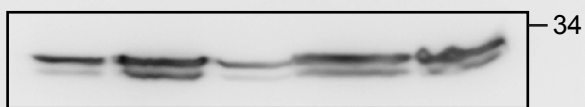

Figure 2H\_2

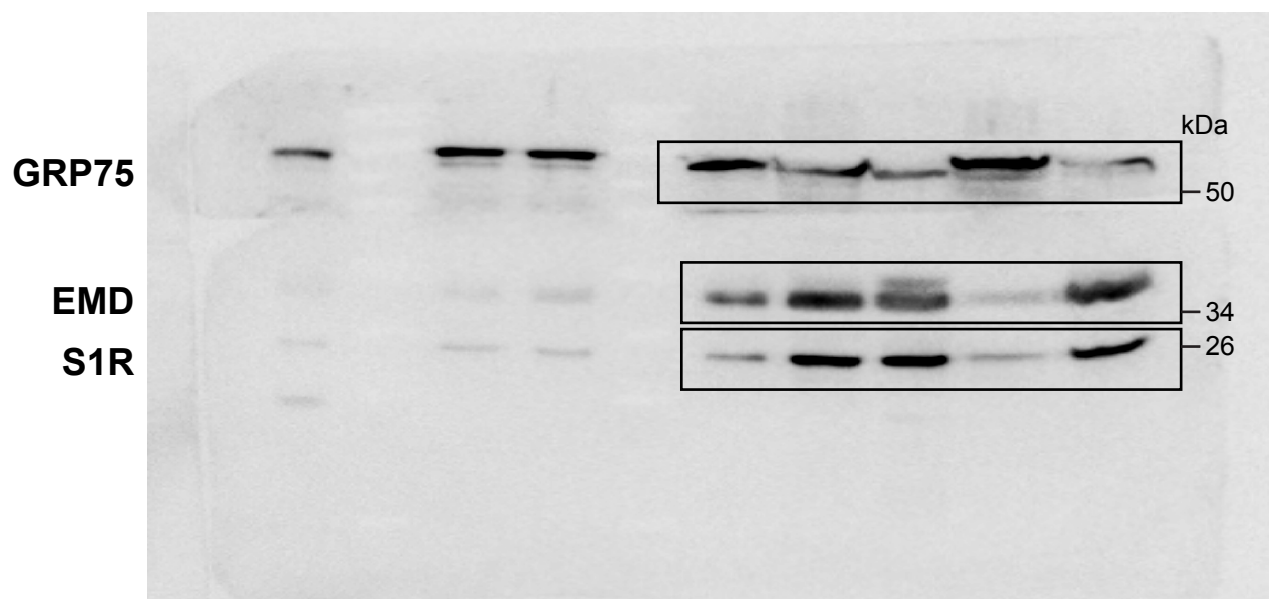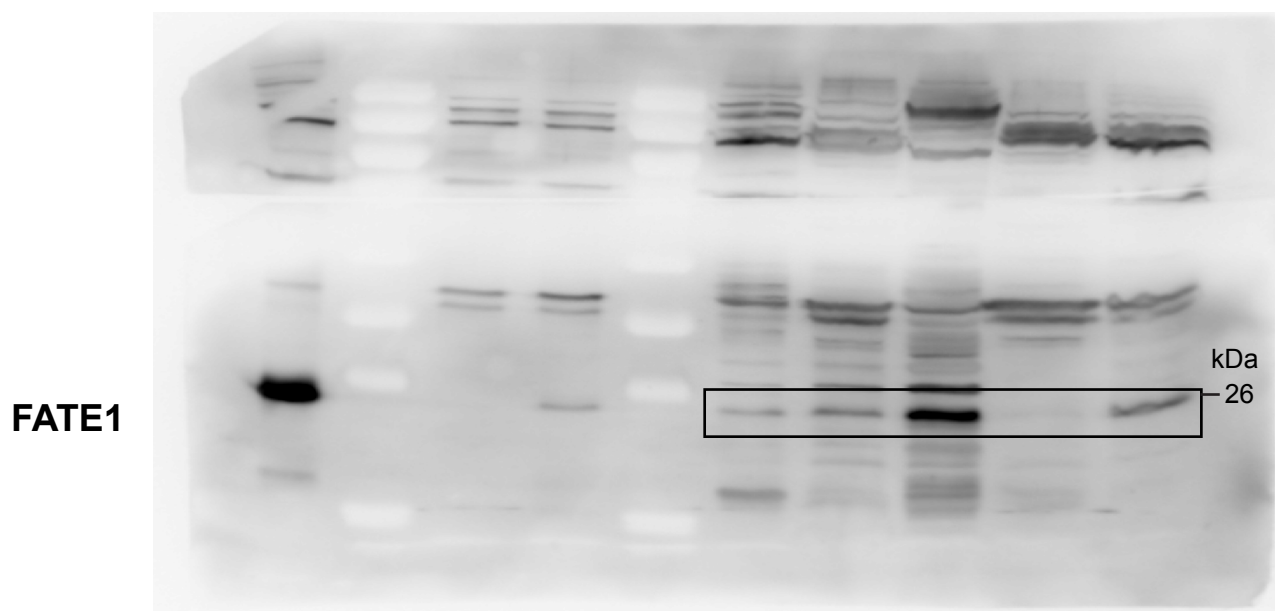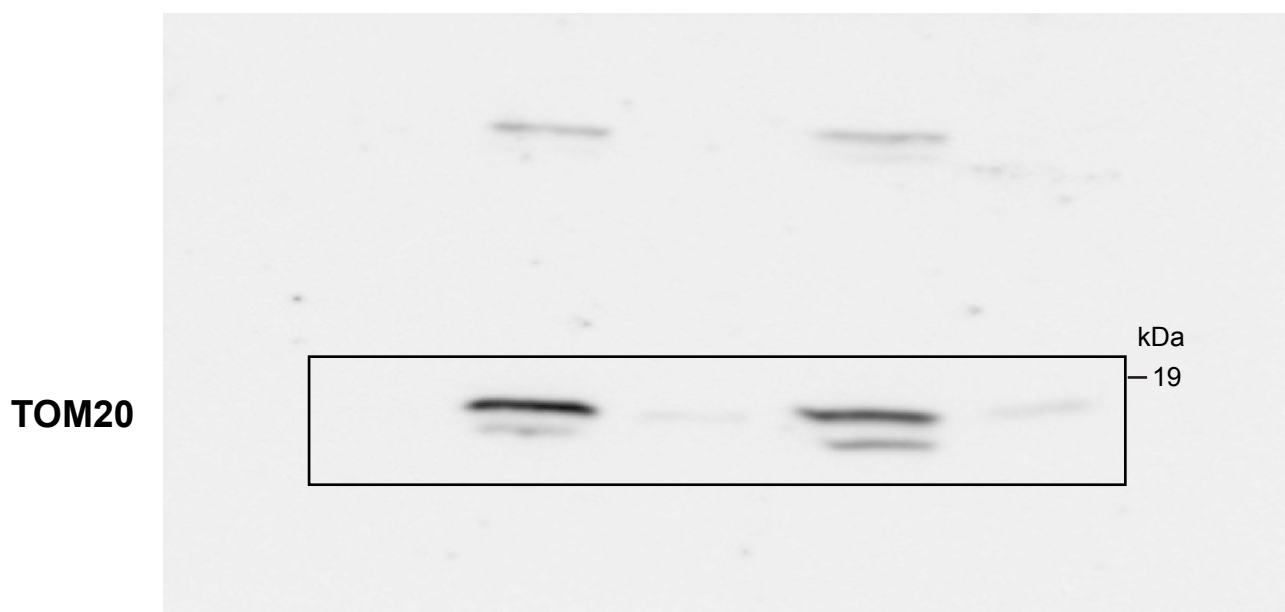

Supplement: EMBR-17-1264-s005.pdf [file EMBR-17-1264-s005.pdf]
